# Supplementary material for: Digestive Characteristics of Hyphantria cunea Larvae on Different Host Plants
Source: MDPI journal article supplement (doi:10.3390/insects14050463), 2023-05-14
Supplement: s1 [file s1]

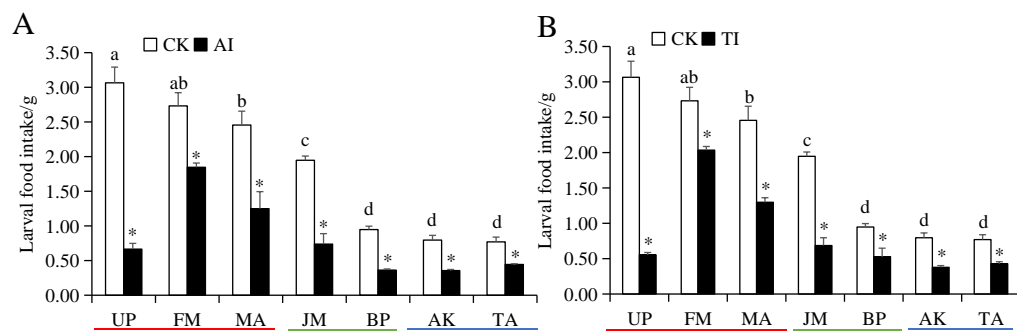

**Figure S1.** Food intake of *H. cunea* larvae treated with AI (A) or TI (B). Data in the figure are presented as the mean  $\pm$  SE ( $N=3$ ); lower case letters indicate the difference between different host plant control groups ( $P < 0.05$ ); \* indicates the significant difference between the non-inhibited and AI treatment groups or between the non-inhibited and TI treatment groups for the same plants ( $P < 0.05$ ).

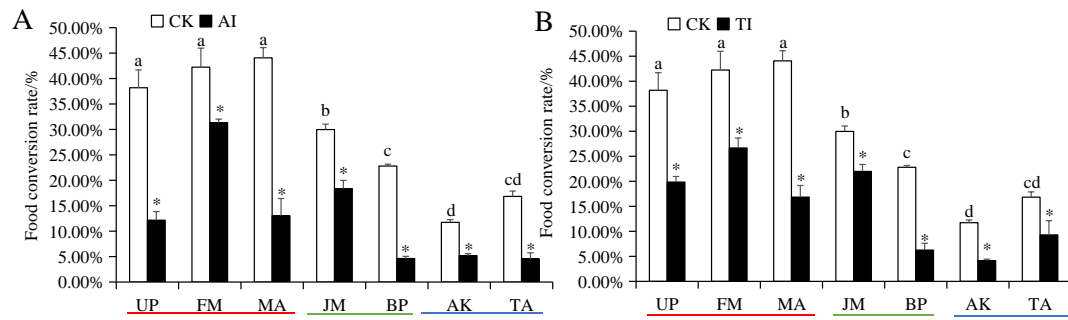

**Figure S2.** Food conversion rate of *H. cunea* larvae treated with AI (A) or TI (B). Data in the figure are presented as the mean  $\pm$  SE ( $N=3$ ); lower case letters indicate the difference between different host plant control groups ( $P < 0.05$ ); \* indicates the significant difference between the non-inhibited and AI treatment groups or between the non-inhibited and TI treatment groups for the same plants ( $P < 0.05$ ).

**Table S1.** Multiple comparisons.

| Dependent Variable         | (I) Groups | (J) Groups | Sig.  |
|----------------------------|------------|------------|-------|
| $\alpha$ -amylase activity | UP         | FM         | 0.512 |
|                            |            | MA         | 0.963 |
|                            |            | JM         | 0.866 |
|                            |            | BP         | 0     |
|                            |            | AK         | 0.001 |
|                            |            | TA         | 0     |
|                            | FM         | UP         | 0.512 |
|                            |            | MA         | 0.541 |
|                            |            | JM         | 0.624 |
|                            |            | BP         | 0     |
|                            |            | AK         | 0     |
|                            |            | TA         | 0     |
|                            | MA         | UP         | 0.963 |
|                            |            | FM         | 0.541 |
|                            |            | JM         | 0.902 |
|                            |            | BP         | 0     |
|                            |            | AK         | 0.001 |
|                            |            | TA         | 0     |
|                            | JM         | UP         | 0.866 |
|                            |            | FM         | 0.624 |
|                            |            | MA         | 0.902 |
|                            |            | BP         | 0     |
|                            |            | AK         | 0.001 |
|                            |            | TA         | 0     |
|                            | BP         | UP         | 0     |
|                            |            | FM         | 0     |
|                            |            | MA         | 0     |
|                            |            | JM         | 0     |
|                            |            | AK         | 0.782 |
|                            |            | TA         | 0.512 |
|                            | AK         | UP         | 0.001 |
|                            |            | FM         | 0     |
|                            |            | MA         | 0.001 |
|                            |            | JM         | 0.001 |
|                            |            | BP         | 0.782 |
|                            |            | TA         | 0.356 |
|                            | TA         | UP         | 0     |
|                            |            | FM         | 0     |
|                            |            | MA         | 0     |
|                            |            | JM         | 0     |
|                            |            | BP         | 0.512 |
|                            |            | AK         | 0.356 |

|                  |    |    |       |
|------------------|----|----|-------|
| Trypsin activity | UP | FM | 0.695 |
|                  |    | MA | 0.371 |
|                  |    | JM | 0.233 |
|                  |    | BP | 0     |
|                  |    | AK | 0     |
|                  |    | TA | 0     |
|                  | FM | UP | 0.695 |
|                  |    | MA | 0.207 |
|                  |    | JM | 0.122 |
|                  |    | BP | 0     |
|                  |    | AK | 0     |
|                  |    | TA | 0     |
|                  | MA | UP | 0.371 |
|                  |    | FM | 0.207 |
|                  |    | JM | 0.752 |
|                  |    | BP | 0     |
|                  |    | AK | 0     |
|                  |    | TA | 0     |
|                  | JM | UP | 0.233 |
|                  |    | FM | 0.122 |
|                  |    | MA | 0.752 |
|                  |    | BP | 0     |
|                  |    | AK | 0     |
|                  |    | TA | 0     |
|                  | BP | UP | 0     |
|                  |    | FM | 0     |
|                  |    | MA | 0     |
|                  |    | JM | 0     |
|                  |    | AK | 0.585 |
|                  |    | TA | 0.569 |
|                  | AK | UP | 0     |
|                  |    | FM | 0     |
|                  |    | MA | 0     |
|                  |    | JM | 0     |
|                  |    | BP | 0.585 |
|                  |    | TA | 0.981 |
|                  | TA | UP | 0     |
|                  |    | FM | 0     |
|                  |    | MA | 0     |
|                  |    | JM | 0     |
|                  |    | BP | 0.569 |
|                  |    | AK | 0.981 |
| Larval weight    | UP | FM | 0     |
|                  |    | MA | 0     |

|             |    |    |       |
|-------------|----|----|-------|
|             |    | JM | 0     |
|             |    | BP | 0     |
|             |    | AK | 0     |
|             |    | TA | 0     |
|             | FM | UP | 0     |
|             |    | MA | 0.982 |
|             |    | JM | 0.982 |
|             |    | BP | 0     |
|             |    | AK | 0     |
|             |    | TA | 0     |
|             | MA | UP | 0     |
|             |    | FM | 0.982 |
|             |    | JM | 0.964 |
|             |    | BP | 0     |
|             |    | AK | 0     |
|             |    | TA | 0     |
|             | JM | UP | 0     |
|             |    | FM | 0.982 |
|             |    | MA | 0.964 |
|             |    | BP | 0     |
|             |    | AK | 0     |
|             |    | TA | 0     |
|             | BP | UP | 0     |
|             |    | FM | 0     |
|             |    | MA | 0     |
|             |    | JM | 0     |
|             |    | AK | 0.104 |
|             |    | TA | 0.013 |
|             | AK | UP | 0     |
|             |    | FM | 0     |
|             |    | MA | 0     |
|             |    | JM | 0     |
|             |    | BP | 0.104 |
|             |    | TA | 0.295 |
|             | TA | UP | 0     |
|             |    | FM | 0     |
|             |    | MA | 0     |
|             |    | JM | 0     |
|             |    | BP | 0.013 |
|             |    | AK | 0.295 |
| Food intake | UP | FM | 0.122 |
|             |    | MA | 0.009 |
|             |    | JM | 0     |
|             |    | BP | 0     |

|                      |    |    |       |
|----------------------|----|----|-------|
|                      |    | AK | 0     |
|                      |    | TA | 0     |
|                      | FM | UP | 0.122 |
|                      |    | MA | 0.189 |
|                      |    | JM | 0.002 |
|                      |    | BP | 0     |
|                      |    | AK | 0     |
|                      |    | TA | 0     |
|                      | MA | UP | 0.009 |
|                      |    | FM | 0.189 |
|                      |    | JM | 0.026 |
|                      |    | BP | 0     |
|                      |    | AK | 0     |
|                      |    | TA | 0     |
|                      | JM | UP | 0     |
|                      |    | FM | 0.002 |
|                      |    | MA | 0.026 |
|                      |    | BP | 0     |
|                      |    | AK | 0     |
|                      |    | TA | 0     |
|                      | BP | UP | 0     |
|                      |    | FM | 0     |
|                      |    | MA | 0     |
|                      |    | JM | 0     |
|                      |    | AK | 0.46  |
|                      |    | TA | 0.387 |
|                      | AK | UP | 0     |
|                      |    | FM | 0     |
|                      |    | MA | 0     |
|                      |    | JM | 0     |
|                      |    | BP | 0.46  |
|                      |    | TA | 0.897 |
|                      | TA | UP | 0     |
|                      |    | FM | 0     |
|                      |    | MA | 0     |
|                      |    | JM | 0     |
|                      |    | BP | 0.387 |
|                      |    | AK | 0.897 |
| Food conversion rate | UP | FM | 0.208 |
|                      |    | MA | 0.076 |
|                      |    | JM | 0.018 |
|                      |    | BP | 0     |
|                      |    | AK | 0     |
|                      |    | TA | 0     |

|                       |    |    |       |
|-----------------------|----|----|-------|
|                       | FM | UP | 0.208 |
|                       |    | MA | 0.562 |
|                       |    | JM | 0.001 |
|                       |    | BP | 0     |
|                       |    | AK | 0     |
|                       |    | TA | 0     |
|                       | MA | UP | 0.076 |
|                       |    | FM | 0.562 |
|                       |    | JM | 0     |
|                       |    | BP | 0     |
|                       |    | AK | 0     |
|                       |    | TA | 0     |
|                       | JM | UP | 0.018 |
|                       |    | FM | 0.001 |
|                       |    | MA | 0     |
|                       |    | BP | 0.035 |
|                       |    | AK | 0     |
|                       |    | TA | 0.001 |
|                       | BP | UP | 0     |
|                       |    | FM | 0     |
|                       |    | MA | 0     |
|                       |    | JM | 0.035 |
|                       |    | AK | 0.003 |
|                       |    | TA | 0.072 |
|                       | AK | UP | 0     |
|                       |    | FM | 0     |
|                       |    | MA | 0     |
|                       |    | JM | 0     |
|                       |    | BP | 0.003 |
|                       |    | TA | 0.12  |
|                       | TA | UP | 0     |
|                       |    | FM | 0     |
|                       |    | MA | 0     |
|                       |    | JM | 0.001 |
|                       |    | BP | 0.072 |
|                       |    | AK | 0.128 |
| <hr/>                 |    |    |       |
| Food utilization rate | UP | FM | 0.437 |
|                       |    | MA | 0.251 |
|                       |    | JM | 0.884 |
|                       |    | BP | 0.102 |
|                       |    | AK | 0     |
|                       |    | TA | 0.001 |
|                       | FM | UP | 0.437 |
|                       |    | MA | 0.697 |

|                       |    |    |       |
|-----------------------|----|----|-------|
|                       |    | JM | 0.525 |
|                       |    | BP | 0.358 |
|                       |    | AK | 0.001 |
|                       |    | TA | 0.003 |
|                       | MA | UP | 0.251 |
|                       |    | FM | 0.697 |
|                       |    | JM | 0.312 |
|                       |    | BP | 0.59  |
|                       |    | AK | 0.001 |
|                       |    | TA | 0.008 |
|                       | JM | UP | 0.884 |
|                       |    | FM | 0.525 |
|                       |    | MA | 0.312 |
|                       |    | BP | 0.132 |
|                       |    | AK | 0     |
|                       |    | TA | 0.001 |
|                       | BP | UP | 0.102 |
|                       |    | FM | 0.358 |
|                       |    | MA | 0.59  |
|                       |    | JM | 0.132 |
|                       |    | AK | 0.004 |
|                       |    | TA | 0.022 |
|                       | AK | UP | 0     |
|                       |    | FM | 0.001 |
|                       |    | MA | 0.001 |
|                       |    | JM | 0     |
|                       |    | BP | 0.004 |
|                       |    | TA | 0.382 |
|                       | TA | UP | 0.001 |
|                       |    | FM | 0.003 |
|                       |    | MA | 0.008 |
|                       |    | JM | 0.001 |
|                       |    | BP | 0.022 |
|                       |    | AK | 0.382 |
| <hr/>                 |    |    |       |
| Food consumption rate | UP | FM | 0.469 |
|                       |    | MA | 0.659 |
|                       |    | JM | 0.007 |
|                       |    | BP | 0     |
|                       |    | AK | 0     |
|                       |    | TA | 0     |
|                       | FM | UP | 0.469 |
|                       |    | MA | 0.774 |
|                       |    | JM | 0.002 |
|                       |    | BP | 0     |



|               |    |    |       |
|---------------|----|----|-------|
|               |    | AK | 0     |
|               |    | TA | 0     |
|               | MA | UP | 0.659 |
|               |    | FM | 0.774 |
|               |    | JM | 0.003 |
|               |    | BP | 0     |
|               |    | AK | 0     |
|               |    | TA | 0     |
|               | JM | UP | 0.007 |
|               |    | FM | 0.002 |
|               |    | MA | 0.003 |
|               |    | BP | 0     |
|               |    | AK | 0     |
|               |    | TA | 0     |
|               | BP | UP | 0     |
|               |    | FM | 0     |
|               |    | MA | 0     |
|               |    | JM | 0     |
|               |    | AK | 0.554 |
|               |    | TA | 0.884 |
|               | AK | UP | 0     |
|               |    | FM | 0     |
|               |    | MA | 0     |
|               |    | JM | 0     |
|               |    | BP | 0.554 |
|               |    | TA | 0.463 |
|               | TA | UP | 0     |
|               |    | FM | 0     |
|               |    | MA | 0     |
|               |    | JM | 0     |
|               |    | BP | 0.884 |
|               |    | AK | 0.463 |
| <hr/>         |    |    |       |
| Total protein | UP | FM | 0.241 |
|               |    | MA | 0.553 |
|               |    | JM | 0.079 |
|               |    | BP | 0.002 |
|               |    | AK | 0.004 |
|               |    | TA | 0.001 |
|               | FM | UP | 0.241 |
|               |    | MA | 0.088 |
|               |    | JM | 0.516 |
|               |    | BP | 0     |
|               |    | AK | 0     |
|               |    | TA | 0     |

|                   |    |    |       |
|-------------------|----|----|-------|
|                   | MA | UP | 0.553 |
|                   |    | FM | 0.088 |
|                   |    | JM | 0.025 |
|                   |    | BP | 0.007 |
|                   |    | AK | 0.014 |
|                   |    | TA | 0.003 |
|                   | JM | UP | 0.079 |
|                   |    | FM | 0.516 |
|                   |    | MA | 0.025 |
|                   |    | BP | 0     |
|                   |    | AK | 0     |
|                   |    | TA | 0     |
|                   | BP | UP | 0.002 |
|                   |    | FM | 0     |
|                   |    | MA | 0.007 |
|                   |    | JM | 0     |
|                   |    | AK | 0.732 |
|                   |    | TA | 0.732 |
|                   | AK | UP | 0.004 |
|                   |    | FM | 0     |
|                   |    | MA | 0.014 |
|                   |    | JM | 0     |
|                   |    | BP | 0.732 |
|                   |    | TA | 0.496 |
|                   | TA | UP | 0.001 |
|                   |    | FM | 0     |
|                   |    | MA | 0.003 |
|                   |    | JM | 0     |
|                   |    | BP | 0.732 |
|                   |    | AK | 0.496 |
| Total amino acids | UP | FM | 0.912 |
|                   |    | MA | 0.518 |
|                   |    | JM | 0.665 |
|                   |    | BP | 0.055 |
|                   |    | AK | 0.018 |
|                   |    | TA | 0.002 |
|                   | FM | UP | 0.912 |
|                   |    | MA | 0.59  |
|                   |    | JM | 0.746 |
|                   |    | BP | 0.068 |
|                   |    | AK | 0.023 |
|                   |    | TA | 0.002 |
|                   | MA | UP | 0.518 |
|                   |    | FM | 0.59  |

|    |    |       |       |       |
|----|----|-------|-------|-------|
|    | JM | JM    | 0.828 |       |
|    |    | BP    | 0.174 |       |
|    |    | AK    | 0.065 |       |
|    |    | TA    | 0.006 |       |
|    |    | UP    | 0.665 |       |
|    |    | FM    | 0.746 |       |
|    |    | MA    | 0.828 |       |
|    |    | BP    | BP    | 0.121 |
|    |    |       | AK    | 0.043 |
|    |    |       | TA    | 0.004 |
|    |    |       | UP    | 0.055 |
|    |    |       | FM    | 0.068 |
|    | MA |       | 0.174 |       |
|    | AK | JM    | 0.121 |       |
|    |    | AK    | 0.575 |       |
|    |    | TA    | 0.096 |       |
|    |    | UP    | 0.018 |       |
|    |    | FM    | 0.023 |       |
|    |    | MA    | 0.065 |       |
|    | TA | JM    | 0.043 |       |
|    |    | BP    | 0.575 |       |
|    |    | TA    | 0.247 |       |
|    |    | UP    | 0.002 |       |
|    |    | FM    | 0.002 |       |
| MA |    | 0.006 |       |       |
| UP | JM | 0.004 |       |       |
|    | BP | 0.096 |       |       |
|    | AK | 0.247 |       |       |
|    | FM | 0.4   |       |       |
|    | MA | 0.963 |       |       |
|    | JM | 0.037 |       |       |
|    | BP | 0     |       |       |
|    | AK | 0.001 |       |       |
|    | TA | 0.003 |       |       |
|    | FM | UP    | 0.4   |       |
|    |    | MA    | 0.425 |       |
|    |    | JM    | 0.007 |       |
| BP |    | 0     |       |       |
| AK |    | 0     |       |       |
| TA |    | 0.001 |       |       |
| MA | UP | 0.963 |       |       |
|    | FM | 0.425 |       |       |
|    | JM | 0.033 |       |       |
|    | BP | 0     |       |       |

|           |    |    |       |
|-----------|----|----|-------|
| Trehalose | JM | AK | 0.001 |
|           |    | TA | 0.003 |
|           |    | UP | 0.037 |
|           |    | FM | 0.007 |
|           |    | MA | 0.033 |
|           |    | BP | 0.043 |
|           | BP | AK | 0.118 |
|           |    | TA | 0.249 |
|           |    | UP | 0     |
|           |    | FM | 0     |
|           |    | MA | 0     |
|           |    | JM | 0.043 |
|           | AK | AK | 0.588 |
|           |    | TA | 0.327 |
|           |    | UP | 0.001 |
|           |    | FM | 0     |
|           |    | MA | 0.001 |
|           |    | JM | 0.118 |
|           | TA | BP | 0.588 |
|           |    | TA | 0.651 |
|           |    | UP | 0.003 |
|           |    | FM | 0.001 |
|           |    | MA | 0.003 |
|           |    | JM | 0.249 |
|           |    | BP | 0.327 |
|           |    | AK | 0.651 |
|           | UP | FM | 0.2   |
|           |    | MA | 0.004 |
|           |    | JM | 0     |
|           |    | BP | 0     |
|           |    | AK | 0     |
|           |    | TA | 0     |
|           | FM | UP | 0.2   |
|           |    | MA | 0     |
|           |    | JM | 0     |
|           |    | BP | 0     |
|           |    | AK | 0     |
|           |    | TA | 0     |
|           | MA | UP | 0.004 |
|           |    | FM | 0     |
|           |    | JM | 0.004 |
|           |    | BP | 0     |
|           |    | AK | 0     |
|           |    | TA | 0     |

|                  |    |    |       |
|------------------|----|----|-------|
|                  | JM | UP | 0     |
|                  |    | FM | 0     |
|                  |    | MA | 0.004 |
|                  |    | BP | 0     |
|                  |    | AK | 0     |
|                  |    | TA | 0     |
|                  | BP | UP | 0     |
|                  |    | FM | 0     |
|                  |    | MA | 0     |
|                  |    | JM | 0     |
|                  |    | AK | 0.01  |
|                  |    | TA | 0.008 |
|                  | AK | UP | 0     |
|                  |    | FM | 0     |
|                  |    | MA | 0     |
|                  |    | JM | 0     |
|                  |    | BP | 0.01  |
|                  |    | TA | 0     |
|                  | TA | UP | 0     |
|                  |    | FM | 0     |
|                  |    | MA | 0     |
|                  |    | JM | 0     |
|                  |    | BP | 0.008 |
|                  |    | AK | 0     |
| <hr/>            |    |    |       |
| Free fatty acids | UP | FM | 0     |
|                  |    | MA | 0.385 |
|                  |    | JM | 0     |
|                  |    | BP | 0     |
|                  |    | AK | 0     |
|                  |    | TA | 0     |
|                  | FM | UP | 0     |
|                  |    | MA | 0     |
|                  |    | JM | 0.552 |
|                  |    | BP | 0     |
|                  |    | AK | 0.001 |
|                  |    | TA | 0     |
|                  | MA | UP | 0.385 |
|                  |    | FM | 0     |
|                  |    | JM | 0     |
|                  |    | BP | 0     |
|                  |    | AK | 0     |
|                  |    | TA | 0     |
|                  | JM | UP | 0     |
|                  |    | FM | 0.552 |

|  |    |    |       |
|--|----|----|-------|
|  |    | MA | 0     |
|  |    | BP | 0.001 |
|  |    | AK | 0.002 |
|  |    | TA | 0.001 |
|  | BP | UP | 0     |
|  |    | FM | 0     |
|  |    | MA | 0     |
|  |    | JM | 0.001 |
|  |    | AK | 0.629 |
|  |    | TA | 0.905 |
|  | AK | UP | 0     |
|  |    | FM | 0.001 |
|  |    | MA | 0     |
|  |    | JM | 0.002 |
|  |    | BP | 0.629 |
|  |    | TA | 0.715 |
|  | TA | UP | 0     |
|  |    | FM | 0     |
|  |    | MA | 0     |
|  |    | JM | 0.001 |
|  |    | BP | 0.905 |
|  |    | AK | 0.715 |

**Table S2.** Test of homogeneity of variances.

|                            | Levene Statistic | Df1 | Df2 | Sig.  |
|----------------------------|------------------|-----|-----|-------|
| $\alpha$ -amylase activity | 1.525            | 6   | 14  | 0.241 |
| Trypsin activity           | 1.285            | 6   | 14  | 0.325 |
| Larval weight              | 2.212            | 6   | 14  | 0.104 |
| Food intake                | 2.318            | 6   | 14  | 0.091 |
| Food conversion rate       | 2.409            | 6   | 14  | 0.082 |
| Food utilization rate      | 2.629            | 6   | 14  | 0.064 |
| Food consumption rate      | 2.255            | 6   | 14  | 0.099 |
| Total protein              | 1.019            | 6   | 14  | 0.452 |
| Total amino acids          | 1.506            | 6   | 14  | 0.247 |
| Glucose                    | 2.038            | 6   | 14  | 0.128 |
| Trehalose                  | 1.173            | 6   | 14  | 0.374 |
| Free fatty acids           | 1.646            | 6   | 14  | 0.207 |

Table S3. Independent samples test.

|                                         |                                | Levene's Test for<br>Equality of<br>Variances |       | t-test for Equality of Means |       |                    |
|-----------------------------------------|--------------------------------|-----------------------------------------------|-------|------------------------------|-------|--------------------|
| Groups                                  |                                | F                                             | Sig.  | t                            | df    | Sig.<br>(2-tailed) |
| $\alpha$ -amylase<br>activity-CKvsAI-UP | Equal variances<br>assumed     | 10.559                                        | 0.031 | 5.014                        | 4     | 0.007              |
|                                         | Equal variances<br>not assumed |                                               |       | 5.014                        | 2.099 | 0.034              |
| $\alpha$ -amylase<br>activity-CKvsTI-UP | Equal variances<br>assumed     | 5.229                                         | 0.084 | 5.436                        | 4     | 0.006              |
|                                         | Equal variances<br>not assumed |                                               |       | 5.436                        | 2.536 | 0.019              |
| $\alpha$ -amylase<br>activity-CKvsAI-FM | Equal variances<br>assumed     | 0.637                                         | 0.47  | 5.413                        | 4     | 0.006              |
|                                         | Equal variances<br>not assumed |                                               |       | 5.413                        | 3.622 | 0.007              |
| $\alpha$ -amylase<br>activity-CKvsTI-FM | Equal variances<br>assumed     | 2.4                                           | 0.196 | 5.563                        | 4     | 0.005              |
|                                         | Equal variances<br>not assumed |                                               |       | 5.563                        | 2.941 | 0.012              |
| $\alpha$ -amylase<br>activity-CKvsAI-MA | Equal variances<br>assumed     | 4.994                                         | 0.089 | 12.035                       | 4     | 0                  |
|                                         | Equal variances<br>not assumed |                                               |       | 12.035                       | 2     | 0.007              |
| $\alpha$ -amylase<br>activity-CKvsTI-MA | Equal variances<br>assumed     | 0                                             | 1     | 6.397                        | 4     | 0.003              |
|                                         | Equal variances<br>not assumed |                                               |       | 6.397                        | 3.975 | 0.003              |
| $\alpha$ -amylase<br>activity-CKvsAI-JM | Equal variances<br>assumed     | 1.779                                         | 0.253 | 3.428                        | 4     | 0.027              |
|                                         | Equal variances<br>not assumed |                                               |       | 3.428                        | 2.444 | 0.057              |
| $\alpha$ -amylase<br>activity-CKvsTI-JM | Equal variances<br>assumed     | 2.291                                         | 0.205 | 3.282                        | 4     | 0.03               |
|                                         | Equal variances<br>not assumed |                                               |       | 3.282                        | 2.253 | 0.069              |
| $\alpha$ -amylase<br>activity-CKvsAI-BP | Equal variances<br>assumed     | 1.815                                         | 0.249 | 2.963                        | 4     | 0.041              |
|                                         | Equal variances<br>not assumed |                                               |       | 2.963                        | 2.53  | 0.073              |



|                                         |                                |        |       |       |       |       |
|-----------------------------------------|--------------------------------|--------|-------|-------|-------|-------|
| $\alpha$ -amylase<br>activity-CKvsTI-BP | Equal variances<br>assumed     | 0.835  | 0.412 | 2.78  | 4     | 0.05  |
|                                         | Equal variances<br>not assumed |        |       | 2.78  | 3.067 | 0.067 |
| $\alpha$ -amylase<br>activity-CKvsAI-AK | Equal variances<br>assumed     | 3.522  | 0.134 | 6.164 | 4     | 0.004 |
|                                         | Equal variances<br>not assumed |        |       | 6.164 | 2.108 | 0.022 |
| $\alpha$ -amylase<br>activity-CKvsTI-AK | Equal variances<br>assumed     | 0.451  | 0.539 | 4.212 | 4     | 0.014 |
|                                         | Equal variances<br>not assumed |        |       | 4.212 | 3.421 | 0.019 |
| $\alpha$ -amylase<br>activity-CKvsAI-TA | Equal variances<br>assumed     | 0.416  | 0.554 | 3.302 | 4     | 0.03  |
|                                         | Equal variances<br>not assumed |        |       | 3.302 | 3.739 | 0.033 |
| $\alpha$ -amylase<br>activity-CKvsTI-TA | Equal variances<br>assumed     | 2.579  | 0.184 | 3.833 | 4     | 0.019 |
|                                         | Equal variances<br>not assumed |        |       | 3.833 | 2.696 | 0.038 |
| Trypsin activity-CKvsAI-UP              | Equal variances<br>assumed     | 3.075  | 0.154 | 3.225 | 4     | 0.032 |
|                                         | Equal variances<br>not assumed |        |       | 3.225 | 2.621 | 0.058 |
| Trypsin activity-CKvsTI-UP              | Equal variances<br>assumed     | 1.718  | 0.26  | 3.068 | 4     | 0.037 |
|                                         | Equal variances<br>not assumed |        |       | 3.068 | 3.033 | 0.054 |
| Trypsin activity-CKvsAI-FM              | Equal variances<br>assumed     | 13.002 | 0.023 | 6.366 | 4     | 0.003 |
|                                         | Equal variances<br>not assumed |        |       | 6.366 | 2.016 | 0.023 |
| Trypsin activity-CKvsTI-FM              | Equal variances<br>assumed     | 10.309 | 0.033 | 5.886 | 4     | 0.004 |
|                                         | Equal variances<br>not assumed |        |       | 5.886 | 2.098 | 0.025 |
| Trypsin<br>activity-CKvsAI-MA           | Equal variances<br>assumed     | 3.435  | 0.137 | 2.79  | 4     | 0.049 |
|                                         | Equal variances<br>not assumed |        |       | 2.79  | 2.208 | 0.097 |
| Trypsin activity-CKvsTI-MA              | Equal variances<br>assumed     | 4.252  | 0.108 | 3.176 | 4     | 0.034 |
|                                         | Equal variances<br>not assumed |        |       | 3.176 | 2.082 | 0.082 |

|                            |                             |        |       |        |       |       |
|----------------------------|-----------------------------|--------|-------|--------|-------|-------|
| Trypsin activity-CKvsAI-JM | Equal variances assumed     | 0.202  | 0.677 | -3.518 | 4     | 0.024 |
|                            | Equal variances not assumed |        |       | -3.518 | 3.903 | 0.026 |
| Trypsin activity-CKvsTI-JM | Equal variances assumed     | 3.354  | 0.141 | 2.981  | 4     | 0.041 |
|                            | Equal variances not assumed |        |       | 2.981  | 2.862 | 0.062 |
| Trypsin activity-CKvsAI-BP | Equal variances assumed     | 0.706  | 0.448 | -3.186 | 4     | 0.033 |
|                            | Equal variances not assumed |        |       | -3.186 | 3.627 | 0.038 |
| Trypsin activity-CKvsTI-BP | Equal variances assumed     | 7.611  | 0.051 | 3.313  | 4     | 0.03  |
|                            | Equal variances not assumed |        |       | 3.313  | 2.181 | 0.071 |
| Trypsin activity-CKvsAI-AK | Equal variances assumed     | 1.704  | 0.262 | 4.724  | 4     | 0.009 |
|                            | Equal variances not assumed |        |       | 4.724  | 3.295 | 0.015 |
| Trypsin activity-CKvsTI-AK | Equal variances assumed     | 1.421  | 0.299 | 4.453  | 4     | 0.011 |
|                            | Equal variances not assumed |        |       | 4.453  | 3.401 | 0.016 |
| Trypsin activity-CKvsAI-TA | Equal variances assumed     | 1.182  | 0.338 | 2.884  | 4     | 0.045 |
|                            | Equal variances not assumed |        |       | 2.884  | 3.443 | 0.054 |
| Trypsin activity-CKvsTI-TA | Equal variances assumed     | 6.599  | 0.062 | 4.57   | 4     | 0.01  |
|                            | Equal variances not assumed |        |       | 4.57   | 2.314 | 0.034 |
| Larval weight-CKvsAI-UP    | Equal variances assumed     | 1.503  | 0.287 | 8.311  | 4     | 0.001 |
|                            | Equal variances not assumed |        |       | 8.311  | 3.37  | 0.002 |
| Larval weight-CKvsTI-UP    | Equal variances assumed     | 13.513 | 0.021 | 9.816  | 4     | 0.001 |
|                            | Equal variances not assumed |        |       | 9.816  | 2.026 | 0.01  |
| Larval weight-CKvsAI-FM    | Equal variances assumed     | 3.245  | 0.146 | 4.333  | 4     | 0.012 |
|                            | Equal variances not assumed |        |       | 4.333  | 2.85  | 0.025 |

|                         |                             |       |       |        |   |       |
|-------------------------|-----------------------------|-------|-------|--------|---|-------|
| Larval weight-CKvsTI-FM | Equal variances assumed     | 7.949 | 0.048 | 2.903  | 4 | 0.044 |
|                         | Equal variances not assumed |       |       |        |   |       |
| Larval weight-CKvsAI-MA | Equal variances assumed     | 0.793 | 0.424 | 3.581  | 4 | 0.023 |
|                         | Equal variances not assumed |       |       |        |   |       |
| Larval weight-CKvsTI-MA | Equal variances assumed     | 1.975 | 0.233 | 3.233  | 4 | 0.032 |
|                         | Equal variances not assumed |       |       |        |   |       |
| Larval weight-CKvsAI-JM | Equal variances assumed     | 1.907 | 0.239 | 4.211  | 4 | 0.014 |
|                         | Equal variances not assumed |       |       |        |   |       |
| Larval weight-CKvsTI-JM | Equal variances assumed     | 3.41  | 0.139 | 4.551  | 4 | 0.01  |
|                         | Equal variances not assumed |       |       |        |   |       |
| Larval weight-CKvsAI-BP | Equal variances assumed     | 1.922 | 0.238 | 11.03  | 4 | 0     |
|                         | Equal variances not assumed |       |       |        |   |       |
| Larval weight-CKvsTI-BP | Equal variances assumed     | 6.649 | 0.061 | 1.665  | 4 | 0.171 |
|                         | Equal variances not assumed |       |       |        |   |       |
| Larval weight-CKvsAI-AK | Equal variances assumed     | 6.305 | 0.066 | 2.9    | 4 | 0.044 |
|                         | Equal variances not assumed |       |       |        |   |       |
| Larval weight-CKvsTI-AK | Equal variances assumed     | 7.366 | 0.053 | 3.487  | 4 | 0.025 |
|                         | Equal variances not assumed |       |       |        |   |       |
| Larval weight-CKvsAI-TA | Equal variances assumed     | 5.249 | 0.084 | 8.668  | 4 | 0.001 |
|                         | Equal variances not assumed |       |       |        |   |       |
| Larval weight-CKvsTI-TA | Equal variances assumed     | 6.563 | 0.063 | 14.571 | 4 | 0     |
|                         | Equal variances not assumed |       |       |        |   |       |

|                       |                             |       |       |        |       |       |
|-----------------------|-----------------------------|-------|-------|--------|-------|-------|
| Food intake-CKvsAI-UP | Equal variances assumed     | 2.648 | 0.179 | 9.964  | 4     | 0.001 |
|                       | Equal variances not assumed |       |       | 9.964  | 2.528 | 0.004 |
| Food intake-CKvsTI-UP | Equal variances assumed     | 5.218 | 0.084 | 10.982 | 4     | 0     |
|                       | Equal variances not assumed |       |       | 10.982 | 2.096 | 0.007 |
| Food intake-CKvsAI-FM | Equal variances assumed     | 2.031 | 0.227 | 4.419  | 4     | 0.012 |
|                       | Equal variances not assumed |       |       | 4.419  | 2.405 | 0.034 |
| Food intake-CKvsTI-FM | Equal variances assumed     | 2.423 | 0.195 | 3.526  | 4     | 0.024 |
|                       | Equal variances not assumed |       |       | 3.526  | 2.29  | 0.059 |
| Food intake-CKvsAI-MA | Equal variances assumed     | 0.092 | 0.776 | 3.815  | 4     | 0.019 |
|                       | Equal variances not assumed |       |       | 3.815  | 3.842 | 0.02  |
| Food intake-CKvsTI-MA | Equal variances assumed     | 5.163 | 0.086 | 5.498  | 4     | 0.005 |
|                       | Equal variances not assumed |       |       | 5.498  | 2.41  | 0.021 |
| Food intake-CKvsAI-JM | Equal variances assumed     | 0.143 | 0.725 | 14.33  | 4     | 0     |
|                       | Equal variances not assumed |       |       | 14.33  | 3.968 | 0     |
| Food intake-CKvsTI-JM | Equal variances assumed     | 0.893 | 0.398 | 10.036 | 4     | 0.001 |
|                       | Equal variances not assumed |       |       | 10.036 | 3.093 | 0.002 |
| Food intake-CKvsAI-BP | Equal variances assumed     | 5.226 | 0.084 | 11.693 | 4     | 0     |
|                       | Equal variances not assumed |       |       | 11.693 | 2.495 | 0.003 |
| Food intake-CKvsTI-BP | Equal variances assumed     | 5.186 | 0.085 | 3.219  | 4     | 0.032 |
|                       | Equal variances not assumed |       |       | 3.219  | 2.584 | 0.06  |
| Food intake-CKvsAI-AK | Equal variances assumed     | 9.268 | 0.038 | 6.293  | 4     | 0.003 |
|                       | Equal variances not assumed |       |       | 6.293  | 2.18  | 0.02  |

|                                |                             |       |       |       |       |       |
|--------------------------------|-----------------------------|-------|-------|-------|-------|-------|
| Food intake-CKvsTI-AK          | Equal variances assumed     | 5.518 | 0.079 | 5.672 | 4     | 0.005 |
|                                | Equal variances not assumed |       |       | 5.672 | 2.532 | 0.017 |
| Food intake-CKvsAI-TA          | Equal variances assumed     | 4.734 | 0.095 | 4.722 | 4     | 0.009 |
|                                | Equal variances not assumed |       |       | 4.722 | 2.127 | 0.037 |
| Food intake-CKvsTI-TA          | Equal variances assumed     | 2.027 | 0.228 | 4.628 | 4     | 0.01  |
|                                | Equal variances not assumed |       |       | 4.628 | 2.701 | 0.024 |
| Food conversion rate-CKvsAI-UP | Equal variances assumed     | 0.815 | 0.418 | 6.676 | 4     | 0.003 |
|                                | Equal variances not assumed |       |       | 6.676 | 2.89  | 0.008 |
| Food conversion rate-CKvsTI-UP | Equal variances assumed     | 1.711 | 0.261 | 4.981 | 4     | 0.008 |
|                                | Equal variances not assumed |       |       | 4.981 | 2.402 | 0.026 |
| Food conversion rate-CKvsAI-FM | Equal variances assumed     | 4.487 | 0.102 | 2.873 | 4     | 0.045 |
|                                | Equal variances not assumed |       |       | 2.873 | 2.142 | 0.095 |
| Food conversion rate-CKvsTI-FM | Equal variances assumed     | 1.132 | 0.347 | 3.68  | 4     | 0.021 |
|                                | Equal variances not assumed |       |       | 3.68  | 3.054 | 0.034 |
| Food conversion rate-CKvsAI-MA | Equal variances assumed     | 0.837 | 0.412 | 7.823 | 4     | 0.001 |
|                                | Equal variances not assumed |       |       | 7.823 | 3.247 | 0.003 |
| Food conversion rate-CKvsTI-MA | Equal variances assumed     | 0.003 | 0.959 | 8.834 | 4     | 0.001 |
|                                | Equal variances not assumed |       |       | 8.834 | 3.924 | 0.001 |
| Food conversion rate-CKvsAI-JM | Equal variances assumed     | 0.58  | 0.489 | 5.984 | 4     | 0.004 |
|                                | Equal variances not assumed |       |       | 5.984 | 3.473 | 0.006 |
| Food conversion rate-CKvsTI-JM | Equal variances assumed     | 0.462 | 0.534 | 4.549 | 4     | 0.01  |
|                                | Equal variances not assumed |       |       | 4.549 | 3.754 | 0.012 |

|                                 |                             |       |       |        |       |       |
|---------------------------------|-----------------------------|-------|-------|--------|-------|-------|
| Food conversion rate-CKvsAI-BP  | Equal variances assumed     | 0.159 | 0.711 | 32.406 | 4     | 0     |
|                                 | Equal variances not assumed |       |       | 32.406 | 3.921 | 0     |
| Food conversion rate-CKvsTI-BP  | Equal variances assumed     | 3.482 | 0.135 | 11.76  | 4     | 0     |
|                                 | Equal variances not assumed |       |       | 11.76  | 2.291 | 0.004 |
| Food conversion rate-CKvsAI-AK  | Equal variances assumed     | 0.701 | 0.45  | 9.849  | 4     | 0.001 |
|                                 | Equal variances not assumed |       |       | 9.849  | 3.617 | 0.001 |
| Food conversion rate-CKvsTI-AK  | Equal variances assumed     | 2.086 | 0.222 | 12.345 | 4     | 0     |
|                                 | Equal variances not assumed |       |       | 12.345 | 3.074 | 0.001 |
| Food conversion rate-CKvsAI-TA  | Equal variances assumed     | 0     | 0.996 | 7.682  | 4     | 0.002 |
|                                 | Equal variances not assumed |       |       | 7.682  | 3.935 | 0.002 |
| Food conversion rate-CKvsTI-TA  | Equal variances assumed     | 3.245 | 0.146 | 2.478  | 4     | 0.068 |
|                                 | Equal variances not assumed |       |       | 2.478  | 2.537 | 0.105 |
| Food utilization rate-CKvsAI-UP | Equal variances assumed     | 0.106 | 0.761 | 6.972  | 4     | 0.002 |
|                                 | Equal variances not assumed |       |       | 6.972  | 3.926 | 0.002 |
| Food utilization rate-CKvsTI-UP | Equal variances assumed     | 0.392 | 0.565 | 3.447  | 4     | 0.026 |
|                                 | Equal variances not assumed |       |       | 3.447  | 3.645 | 0.03  |
| Food utilization rate-CKvsAI-FM | Equal variances assumed     | 2.716 | 0.175 | 2.859  | 4     | 0.046 |
|                                 | Equal variances not assumed |       |       | 2.859  | 2.257 | 0.09  |
| Food utilization rate-CKvsTI-FM | Equal variances assumed     | 3.197 | 0.148 | 4.666  | 4     | 0.01  |
|                                 | Equal variances not assumed |       |       | 4.666  | 2.164 | 0.037 |
| Food utilization rate-CKvsAI-MA | Equal variances assumed     | 0.811 | 0.419 | 13.919 | 4     | 0     |
|                                 | Equal variances not assumed |       |       | 13.919 | 3.595 | 0     |

|                                    |                                |       |       |        |       |       |
|------------------------------------|--------------------------------|-------|-------|--------|-------|-------|
| Food utilization<br>rate-CKvsTI-MA | Equal variances<br>assumed     | 0.968 | 0.381 | 6.421  | 4     | 0.003 |
|                                    | Equal variances<br>not assumed |       |       | 6.421  | 3.318 | 0.006 |
| Food utilization<br>rate-CKvsAI-JM | Equal variances<br>assumed     | 1.493 | 0.289 | 6.28   | 4     | 0.003 |
|                                    | Equal variances<br>not assumed |       |       | 6.28   | 3.013 | 0.008 |
| Food utilization<br>rate-CKvsTI-JM | Equal variances<br>assumed     | 0.05  | 0.834 | 3.29   | 4     | 0.03  |
|                                    | Equal variances<br>not assumed |       |       | 3.29   | 3.977 | 0.03  |
| Food utilization<br>rate-CKvsAI-BP | Equal variances<br>assumed     | 6.006 | 0.07  | 4.634  | 4     | 0.01  |
|                                    | Equal variances<br>not assumed |       |       | 4.634  | 2.139 | 0.038 |
| Food utilization<br>rate-CKvsTI-BP | Equal variances<br>assumed     | 1.601 | 0.274 | 3.628  | 4     | 0.022 |
|                                    | Equal variances<br>not assumed |       |       | 3.628  | 3.058 | 0.035 |
| Food utilization<br>rate-CKvsAI-AK | Equal variances<br>assumed     | 0.296 | 0.615 | 9.844  | 4     | 0.001 |
|                                    | Equal variances<br>not assumed |       |       | 9.844  | 3.517 | 0.001 |
| Food utilization<br>rate-CKvsTI-AK | Equal variances<br>assumed     | 0.133 | 0.734 | 10.553 | 4     | 0     |
|                                    | Equal variances<br>not assumed |       |       | 10.553 | 3.723 | 0.001 |
| Food utilization<br>rate-CKvsAI-TA | Equal variances<br>assumed     | 0.839 | 0.412 | 5.275  | 4     | 0.006 |
|                                    | Equal variances<br>not assumed |       |       | 5.275  | 3.001 | 0.013 |
| Food utilization<br>rate-CKvsTI-TA | Equal variances<br>assumed     | 0.339 | 0.592 | 2.985  | 4     | 0.041 |
|                                    | Equal variances<br>not assumed |       |       | 2.985  | 3.807 | 0.043 |
| Food consumption<br>rate-CKvsAI-UP | Equal variances<br>assumed     | 1.247 | 0.327 | -6.685 | 4     | 0.003 |
|                                    | Equal variances<br>not assumed |       |       | -6.685 | 2.575 | 0.011 |
| Food consumption<br>rate-CKvsTI-UP | Equal variances<br>assumed     | 5.19  | 0.085 | -4.468 | 4     | 0.011 |
|                                    | Equal variances<br>not assumed |       |       | -4.468 | 2.585 | 0.028 |

|                                    |                                |       |       |        |       |       |
|------------------------------------|--------------------------------|-------|-------|--------|-------|-------|
| Food consumption<br>rate-CKvsAI-FM | Equal variances<br>assumed     | 0.07  | 0.804 | -6.057 | 4     | 0.004 |
|                                    | Equal variances<br>not assumed |       |       | -6.057 | 3.92  | 0.004 |
| Food consumption<br>rate-CKvsTI-FM | Equal variances<br>assumed     | 4.688 | 0.096 | -3.493 | 4     | 0.025 |
|                                    | Equal variances<br>not assumed |       |       | -3.493 | 2.641 | 0.048 |
| Food consumption<br>rate-CKvsAI-MA | Equal variances<br>assumed     | 3.897 | 0.12  | -4.301 | 4     | 0.013 |
|                                    | Equal variances<br>not assumed |       |       | -4.301 | 2.542 | 0.032 |
| Food consumption<br>rate-CKvsTI-MA | Equal variances<br>assumed     | 2.86  | 0.166 | -5.958 | 4     | 0.004 |
|                                    | Equal variances<br>not assumed |       |       | -5.958 | 2.767 | 0.012 |
| Food consumption<br>rate-CKvsAI-JM | Equal variances<br>assumed     | 0.241 | 0.649 | -3.06  | 4     | 0.038 |
|                                    | Equal variances<br>not assumed |       |       | -3.06  | 3.896 | 0.039 |
| Food consumption<br>rate-CKvsTI-JM | Equal variances<br>assumed     | 0.232 | 0.655 | -4.584 | 4     | 0.01  |
|                                    | Equal variances<br>not assumed |       |       | -4.584 | 3.816 | 0.011 |
| Food consumption<br>rate-CKvsAI-BP | Equal variances<br>assumed     | 2.821 | 0.168 | -3.023 | 4     | 0.039 |
|                                    | Equal variances<br>not assumed |       |       | -3.023 | 2.872 | 0.06  |
| Food consumption<br>rate-CKvsTI-BP | Equal variances<br>assumed     | 0.698 | 0.451 | -3.63  | 4     | 0.022 |
|                                    | Equal variances<br>not assumed |       |       | -3.63  | 3.188 | 0.033 |
| Food consumption<br>rate-CKvsAI-AK | Equal variances<br>assumed     | 1.217 | 0.332 | -4.604 | 4     | 0.01  |
|                                    | Equal variances<br>not assumed |       |       | -4.604 | 3.186 | 0.017 |
| Food consumption<br>rate-CKvsTI-AK | Equal variances<br>assumed     | 0.799 | 0.422 | -11.05 | 4     | 0     |
|                                    | Equal variances<br>not assumed |       |       | -11.05 | 3.565 | 0.001 |
| Food consumption<br>rate-CKvsAI-TA | Equal variances<br>assumed     | 3.582 | 0.131 | -6.487 | 4     | 0.003 |
|                                    | Equal variances<br>not assumed |       |       | -6.487 | 2.449 | 0.013 |



|                                    |                                |       |       |         |       |       |
|------------------------------------|--------------------------------|-------|-------|---------|-------|-------|
| Food consumption<br>rate-CKvsTI-TA | Equal variances<br>assumed     | 5.166 | 0.085 | -14.929 | 4     | 0     |
|                                    | Equal variances<br>not assumed |       |       | -14.929 | 2.143 | 0.003 |
| Total protein-CKvsAI-UP            | Equal variances<br>assumed     | 2.041 | 0.226 | 3.46    | 4     | 0.026 |
|                                    | Equal variances<br>not assumed |       |       | 3.46    | 2.29  | 0.061 |
| Total protein-CKvsTI-UP            | Equal variances<br>assumed     | 0.047 | 0.839 | 2.838   | 4     | 0.047 |
|                                    | Equal variances<br>not assumed |       |       | 2.838   | 3.923 | 0.048 |
| Total protein-CKvsAI-FM            | Equal variances<br>assumed     | 0.079 | 0.792 | 3.093   | 4     | 0.036 |
|                                    | Equal variances<br>not assumed |       |       | 3.093   | 3.931 | 0.037 |
| Total protein-CKvsTI-FM            | Equal variances<br>assumed     | 0.168 | 0.703 | 3.541   | 4     | 0.024 |
|                                    | Equal variances<br>not assumed |       |       | 3.541   | 3.726 | 0.027 |
| Total protein-CKvsAI-MA            | Equal variances<br>assumed     | 4.087 | 0.113 | 4.062   | 4     | 0.015 |
|                                    | Equal variances<br>not assumed |       |       | 4.062   | 2.703 | 0.033 |
| Total protein-CKvsTI-MA            | Equal variances<br>assumed     | 4.108 | 0.113 | 2.945   | 4     | 0.042 |
|                                    | Equal variances<br>not assumed |       |       | 2.945   | 2.713 | 0.068 |
| Total protein-CKvsAI-JM            | Equal variances<br>assumed     | 1.294 | 0.319 | -5.963  | 4     | 0.004 |
|                                    | Equal variances<br>not assumed |       |       | -5.963  | 2.905 | 0.01  |
| Total protein-CKvsTI-JM            | Equal variances<br>assumed     | 1.204 | 0.334 | -6.35   | 4     | 0.003 |
|                                    | Equal variances<br>not assumed |       |       | -6.35   | 3.337 | 0.006 |
| Total protein-CKvsAI-BP            | Equal variances<br>assumed     | 5.705 | 0.075 | -2.747  | 4     | 0.052 |
|                                    | Equal variances<br>not assumed |       |       | -2.747  | 2.31  | 0.095 |
| Total protein-CKvsTI-BP            | Equal variances<br>assumed     | 3.039 | 0.156 | -3.011  | 4     | 0.04  |
|                                    | Equal variances<br>not assumed |       |       | -3.011  | 2.347 | 0.078 |

|                             |                             |       |       |        |       |       |
|-----------------------------|-----------------------------|-------|-------|--------|-------|-------|
| Total protein-CKvsAI-AK     | Equal variances assumed     | 3.393 | 0.139 | -4.252 | 4     | 0.013 |
|                             | Equal variances not assumed |       |       | -4.252 | 2.652 | 0.03  |
| Total protein-CKvsTI-AK     | Equal variances assumed     | 2.019 | 0.228 | -2.767 | 4     | 0.05  |
|                             | Equal variances not assumed |       |       | -2.767 | 3.221 | 0.064 |
| Total protein-CKvsAI-TA     | Equal variances assumed     | 1.423 | 0.299 | -1.072 | 4     | 0.344 |
|                             | Equal variances not assumed |       |       | -1.072 | 3.29  | 0.356 |
| Total protein-CKvsTI-TA     | Equal variances assumed     | 4.724 | 0.095 | -1.665 | 4     | 0.171 |
|                             | Equal variances not assumed |       |       | -1.665 | 2.462 | 0.214 |
| Total amino acids-CKvsAI-UP | Equal variances assumed     | 1.342 | 0.311 | -6.016 | 4     | 0.004 |
|                             | Equal variances not assumed |       |       | -6.016 | 2.563 | 0.014 |
| Total amino acids-CKvsTI-UP | Equal variances assumed     | 8.833 | 0.041 | -0.132 | 4     | 0.901 |
|                             | Equal variances not assumed |       |       | -0.132 | 2.062 | 0.907 |
| Total amino acids-CKvsAI-FM | Equal variances assumed     | 0.757 | 0.433 | 4.951  | 4     | 0.008 |
|                             | Equal variances not assumed |       |       | 4.951  | 3.347 | 0.012 |
| Total amino acids-CKvsTI-FM | Equal variances assumed     | 0.244 | 0.647 | 3.497  | 4     | 0.025 |
|                             | Equal variances not assumed |       |       | 3.497  | 3.908 | 0.026 |
| Total amino acids-CKvsAI-MA | Equal variances assumed     | 5.828 | 0.073 | -3.874 | 4     | 0.018 |
|                             | Equal variances not assumed |       |       | -3.874 | 2.082 | 0.057 |
| Total amino acids-CKvsTI-MA | Equal variances assumed     | 0.224 | 0.661 | -7.562 | 4     | 0.002 |
|                             | Equal variances not assumed |       |       | -7.562 | 3.763 | 0.002 |
| Total amino acids-CKvsAI-JM | Equal variances assumed     | 0.008 | 0.934 | 3.981  | 4     | 0.016 |
|                             | Equal variances not assumed |       |       | 3.981  | 3.974 | 0.017 |

|                             |                             |        |       |        |       |       |
|-----------------------------|-----------------------------|--------|-------|--------|-------|-------|
| Total amino acids-CKvsTI-JM | Equal variances assumed     | 11.868 | 0.026 | 5.983  | 4     | 0.004 |
|                             | Equal variances not assumed |        |       | 5.983  | 2.065 | 0.025 |
| Total amino acids-CKvsAI-BP | Equal variances assumed     | 2.087  | 0.222 | 3.096  | 4     | 0.036 |
|                             | Equal variances not assumed |        |       | 3.096  | 3.135 | 0.05  |
| Total amino acids-CKvsTI-BP | Equal variances assumed     | 4.977  | 0.09  | 2.769  | 4     | 0.05  |
|                             | Equal variances not assumed |        |       | 2.769  | 2.511 | 0.085 |
| Total amino acids-CKvsAI-AK | Equal variances assumed     | 5.039  | 0.088 | 3.305  | 4     | 0.03  |
|                             | Equal variances not assumed |        |       | 3.305  | 2.469 | 0.06  |
| Total amino acids-CKvsTI-AK | Equal variances assumed     | 0.239  | 0.651 | 3.379  | 4     | 0.028 |
|                             | Equal variances not assumed |        |       | 3.379  | 3.881 | 0.029 |
| Total amino acids-CKvsAI-TA | Equal variances assumed     | 5.075  | 0.087 | 2.882  | 4     | 0.045 |
|                             | Equal variances not assumed |        |       | 2.882  | 2.472 | 0.08  |
| Total amino acids-CKvsTI-TA | Equal variances assumed     | 1.406  | 0.301 | 5.149  | 4     | 0.007 |
|                             | Equal variances not assumed |        |       | 5.149  | 3.345 | 0.011 |
| Glucose-CKvsAI-UP           | Equal variances assumed     | 1.129  | 0.348 | 17.455 | 4     | 0     |
|                             | Equal variances not assumed |        |       | 17.455 | 3.139 | 0     |
| Glucose-CKvsTI-UP           | Equal variances assumed     | 0.066  | 0.81  | 10.442 | 4     | 0     |
|                             | Equal variances not assumed |        |       | 10.442 | 3.955 | 0.001 |
| Glucose-CKvsAI-FM           | Equal variances assumed     | 11.163 | 0.029 | 3.095  | 4     | 0.036 |
|                             | Equal variances not assumed |        |       | 3.095  | 2.046 | 0.088 |
| Glucose-CKvsTI-FM           | Equal variances assumed     | 0.861  | 0.406 | 3.18   | 4     | 0.034 |
|                             | Equal variances not assumed |        |       | 3.18   | 3.582 | 0.039 |

|                     |                             |       |       |        |       |       |
|---------------------|-----------------------------|-------|-------|--------|-------|-------|
| Glucose-CKvsAI-MA   | Equal variances assumed     | 0.563 | 0.495 | 3.76   | 4     | 0.02  |
|                     | Equal variances not assumed |       |       | 3.76   | 3.539 | 0.025 |
| Glucose-CKvsTI-MA   | Equal variances assumed     | 1.179 | 0.339 | 4.852  | 4     | 0.008 |
|                     | Equal variances not assumed |       |       | 4.852  | 3.484 | 0.012 |
| Glucose-CKvsAI-JM   | Equal variances assumed     | 0.072 | 0.802 | 5.975  | 4     | 0.004 |
|                     | Equal variances not assumed |       |       | 5.975  | 3.866 | 0.004 |
| Glucose-CKvsTI-JM   | Equal variances assumed     | 0.279 | 0.625 | 4.909  | 4     | 0.008 |
|                     | Equal variances not assumed |       |       | 4.909  | 3.505 | 0.011 |
| Glucose-CKvsAI-BP   | Equal variances assumed     | 2.02  | 0.228 | 7.386  | 4     | 0.002 |
|                     | Equal variances not assumed |       |       | 7.386  | 2.825 | 0.006 |
| Glucose-CKvsTI-BP   | Equal variances assumed     | 4.707 | 0.096 | 2.917  | 4     | 0.043 |
|                     | Equal variances not assumed |       |       | 2.917  | 2.262 | 0.087 |
| Glucose-CKvsAI-AK   | Equal variances assumed     | 0.177 | 0.695 | 4.589  | 4     | 0.01  |
|                     | Equal variances not assumed |       |       | 4.589  | 3.78  | 0.012 |
| Glucose-CKvsTI-AK   | Equal variances assumed     | 1.944 | 0.236 | 2.975  | 4     | 0.041 |
|                     | Equal variances not assumed |       |       | 2.975  | 3.194 | 0.054 |
| Glucose-CKvsAI-TA   | Equal variances assumed     | 4.436 | 0.103 | 7.242  | 4     | 0.002 |
|                     | Equal variances not assumed |       |       | 7.242  | 2.601 | 0.009 |
| Glucose-CKvsTI-TA   | Equal variances assumed     | 2.878 | 0.165 | 3.197  | 4     | 0.033 |
|                     | Equal variances not assumed |       |       | 3.197  | 2.902 | 0.052 |
| Trehalose-CKvsAI-UP | Equal variances assumed     | 1.31  | 0.316 | 19.254 | 4     | 0     |
|                     | Equal variances not assumed |       |       | 19.254 | 2.673 | 0.001 |

|                     |                                |       |       |        |       |       |
|---------------------|--------------------------------|-------|-------|--------|-------|-------|
| Trehalose-CKvsTI-UP | Equal variances<br>assumed     | 0.036 | 0.86  | 16.022 | 4     | 0     |
|                     | Equal variances<br>not assumed |       |       | 16.022 | 3.846 | 0     |
| Trehalose-CKvsAI-FM | Equal variances<br>assumed     | 1.857 | 0.245 | 7.701  | 4     | 0.002 |
|                     | Equal variances<br>not assumed |       |       | 7.701  | 3.103 | 0.004 |
| Trehalose-CKvsTI-FM | Equal variances<br>assumed     | 0.046 | 0.841 | 10.564 | 4     | 0     |
|                     | Equal variances<br>not assumed |       |       | 10.564 | 3.803 | 0.001 |
| Trehalose-CKvsAI-MA | Equal variances<br>assumed     | 2.672 | 0.177 | 11.152 | 4     | 0     |
|                     | Equal variances<br>not assumed |       |       | 11.152 | 2.481 | 0.004 |
| Trehalose-CKvsTI-MA | Equal variances<br>assumed     | 0.804 | 0.421 | 6.918  | 4     | 0.002 |
|                     | Equal variances<br>not assumed |       |       | 6.918  | 3.322 | 0.004 |
| Trehalose-CKvsAI-JM | Equal variances<br>assumed     | 2.348 | 0.2   | 4.715  | 4     | 0.009 |
|                     | Equal variances<br>not assumed |       |       | 4.715  | 2.338 | 0.031 |
| Trehalose-CKvsTI-JM | Equal variances<br>assumed     | 5.875 | 0.072 | 4.027  | 4     | 0.016 |
|                     | Equal variances<br>not assumed |       |       | 4.027  | 2.189 | 0.048 |
| Trehalose-CKvsAI-BP | Equal variances<br>assumed     | 1.011 | 0.372 | 4.335  | 4     | 0.012 |
|                     | Equal variances<br>not assumed |       |       | 4.335  | 3.292 | 0.019 |
| Trehalose-CKvsTI-BP | Equal variances<br>assumed     | 4.757 | 0.095 | 2.702  | 4     | 0.054 |
|                     | Equal variances<br>not assumed |       |       | 2.702  | 2.533 | 0.089 |
| Trehalose-CKvsAI-AK | Equal variances<br>assumed     | 0.258 | 0.638 | 3.885  | 4     | 0.018 |
|                     | Equal variances<br>not assumed |       |       | 3.885  | 3.599 | 0.022 |
| Trehalose-CKvsTI-AK | Equal variances<br>assumed     | 3.978 | 0.117 | 7.726  | 4     | 0.002 |
|                     | Equal variances<br>not assumed |       |       | 7.726  | 2.429 | 0.009 |

|                             |                             |       |       |         |       |       |
|-----------------------------|-----------------------------|-------|-------|---------|-------|-------|
| Trehalose-CKvsAI-TA         | Equal variances assumed     | 1.257 | 0.325 | 7.205   | 4     | 0.002 |
|                             | Equal variances not assumed |       |       | 7.205   | 2.639 | 0.008 |
| Trehalose-CKvsTI-TA         | Equal variances assumed     | 0.576 | 0.49  | 6.382   | 4     | 0.003 |
|                             | Equal variances not assumed |       |       | 6.382   | 3.162 | 0.007 |
| Free fatty acids -CKvsAI-UP | Equal variances assumed     | 2.066 | 0.224 | -2.957  | 4     | 0.042 |
|                             | Equal variances not assumed |       |       | -2.957  | 3.16  | 0.056 |
| Free fatty acids -CKvsTI-UP | Equal variances assumed     | 5.711 | 0.075 | -3.562  | 4     | 0.024 |
|                             | Equal variances not assumed |       |       | -3.562  | 2.49  | 0.051 |
| Free fatty acids -CKvsAI-FM | Equal variances assumed     | 4.307 | 0.107 | -2.821  | 4     | 0.048 |
|                             | Equal variances not assumed |       |       | -2.821  | 2.706 | 0.075 |
| Free fatty acids -CKvsTI-FM | Equal variances assumed     | 2.786 | 0.17  | -3.071  | 4     | 0.037 |
|                             | Equal variances not assumed |       |       | -3.071  | 2.874 | 0.058 |
| Free fatty acids -CKvsAI-MA | Equal variances assumed     | 0.493 | 0.521 | -12.727 | 4     | 0     |
|                             | Equal variances not assumed |       |       | -12.727 | 3.755 | 0     |
| Free fatty acids -CKvsTI-MA | Equal variances assumed     | 0.393 | 0.565 | -12.841 | 4     | 0     |
|                             | Equal variances not assumed |       |       | -12.841 | 3.816 | 0     |
| Free fatty acids -CKvsAI-JM | Equal variances assumed     | 1.711 | 0.261 | -5.233  | 4     | 0.006 |
|                             | Equal variances not assumed |       |       | -5.233  | 3.244 | 0.011 |
| Free fatty acids -CKvsTI-JM | Equal variances assumed     | 2.231 | 0.21  | -3.86   | 4     | 0.018 |
|                             | Equal variances not assumed |       |       | -3.86   | 2.493 | 0.042 |
| Free fatty acids -CKvsAI-BP | Equal variances assumed     | 1.08  | 0.357 | 13.393  | 4     | 0     |
|                             | Equal variances not assumed |       |       | 13.393  | 2.668 | 0.002 |

|                             |                             |       |       |       |       |       |
|-----------------------------|-----------------------------|-------|-------|-------|-------|-------|
| Free fatty acids -CKvsTI-BP | Equal variances assumed     | 3.347 | 0.141 | 3.62  | 4     | 0.022 |
|                             | Equal variances not assumed |       |       | 3.62  | 2.46  | 0.05  |
| Free fatty acids -CKvsAI-AK | Equal variances assumed     | 2.334 | 0.201 | 5.218 | 4     | 0.006 |
|                             | Equal variances not assumed |       |       | 5.218 | 2.183 | 0.029 |
| Free fatty acids -CKvsTI-AK | Equal variances assumed     | 0.34  | 0.591 | 3.349 | 4     | 0.029 |
|                             | Equal variances not assumed |       |       | 3.349 | 3.884 | 0.03  |
| Free fatty acids -CKvsAI-TA | Equal variances assumed     | 0.975 | 0.379 | 5.022 | 4     | 0.007 |
|                             | Equal variances not assumed |       |       | 5.022 | 2.835 | 0.017 |
| Free fatty acids -CKvsTI-TA | Equal variances assumed     | 0.541 | 0.503 | 3.235 | 4     | 0.032 |
|                             | Equal variances not assumed |       |       | 3.235 | 3.662 | 0.036 |
